# Supplementary material for: High adherence and low dropout rate in a virtual clinical study of atopic dermatitis through weekly reward-based personalized genetic lifestyle reports
Source: PubMed Central journal article supplement (PMC7332076; doi:10.1371/journal.pone.0235500), 2020-07-02

# High adherence and low dropout rate in a virtual clinical study of atopic dermatitis through weekly reward-based personalized genetic lifestyle reports

*Ari Pall Isberg*

*04-April-2020*

Number of patients: 65. Number of patients not completing: 12

## Retention rate, Kepler Meier graph

```
## Call: survfit(formula = Surv(time_dropped_out, missing_both) ~ 1, data = surv_data)
```

```
##
```

| ## | time | n.risk | n.event | survival | std.err | lower 95% CI | upper 95% CI |
|----|------|--------|---------|----------|---------|--------------|--------------|
| ## | 0    | 65     | 8       | 0.877    | 0.0407  | 0.801        | 0.961        |
| ## | 3    | 57     | 2       | 0.846    | 0.0448  | 0.763        | 0.939        |
| ## | 4    | 55     | 1       | 0.831    | 0.0465  | 0.744        | 0.927        |
| ## | 6    | 54     | 1       | 0.815    | 0.0481  | 0.726        | 0.915        |

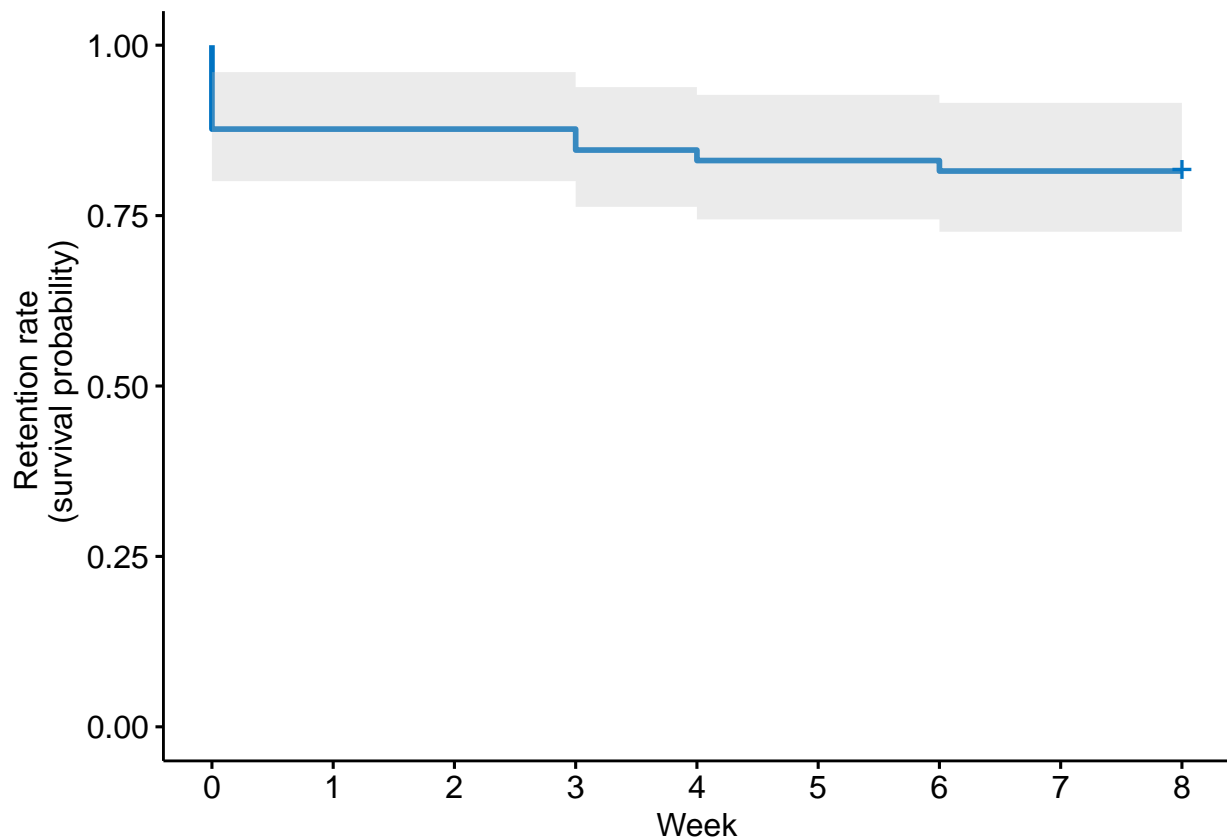

# Visualize adherence

## Bar plot 65 patients

### Name of variables

- sum\_form: Number tasks completed for forms for a given week
- sum\_pic: Number tasks completed for pics for a given week
- n: Number of tasks available for form OR pic
- sum\_all: Number tasks completed for pics and forms for a given week
- n\_all: Number of tasks available for form AND pic
- perc\_form:  $\text{sum\_form}/n$
- perc\_pic:  $\text{sum\_pic}/n$
- cumsum\_form: Cumulative sum for sum\_form
- cumsum\_pic: Cumulative sum for sum\_pic
- cumsum\_n: Cumulative sum for n
- cumsum\_all: Cumulative sum for sum\_all
- cumsum\_n\_all: Cumulative sum for n\_all
- cumperc\_form:  $\text{cumsum\_form}/\text{cumsum\_n}$
- cumperc\_pic:  $\text{cumsum\_pic}/\text{cumsum\_n}$
- cumperc\_all:  $\text{cumsum\_all}/\text{cumsum\_n\_all}$

| variable     | week_1 | week_2 | week_3 | week_4 | week_5 | week_6 | week_7 | week_8 |
|--------------|--------|--------|--------|--------|--------|--------|--------|--------|
| sum_form     | 56     | 54     | 50     | 45     | 52     | 51     | 48     | 50     |
| sum_pic      | 58     | 52     | 52     | 47     | 53     | 51     | 46     | 45     |
| n            | 65     | 65     | 65     | 65     | 65     | 65     | 65     | 65     |
| sum_all      | 114    | 106    | 102    | 92     | 105    | 102    | 94     | 95     |
| n_all        | 130    | 130    | 130    | 130    | 130    | 130    | 130    | 130    |
| perc_form    | 0.862  | 0.831  | 0.769  | 0.692  | 0.8    | 0.785  | 0.738  | 0.769  |
| perc_pic     | 0.892  | 0.8    | 0.8    | 0.723  | 0.815  | 0.785  | 0.708  | 0.692  |
| cumsum_form  | 56     | 110    | 160    | 205    | 257    | 308    | 356    | 406    |
| cumsum_pic   | 58     | 110    | 162    | 209    | 262    | 313    | 359    | 404    |
| cumsum_n     | 65     | 130    | 195    | 260    | 325    | 390    | 455    | 520    |
| cumsum_all   | 114    | 220    | 322    | 414    | 519    | 621    | 715    | 810    |
| cumsum_n_all | 130    | 260    | 390    | 520    | 650    | 780    | 910    | 1040   |
| cumperc_form | 0.862  | 0.846  | 0.821  | 0.788  | 0.791  | 0.79   | 0.782  | 0.781  |
| cumperc_pic  | 0.892  | 0.846  | 0.831  | 0.804  | 0.806  | 0.803  | 0.789  | 0.777  |
| cumperc_all  | 0.877  | 0.846  | 0.826  | 0.796  | 0.798  | 0.796  | 0.786  | 0.779  |

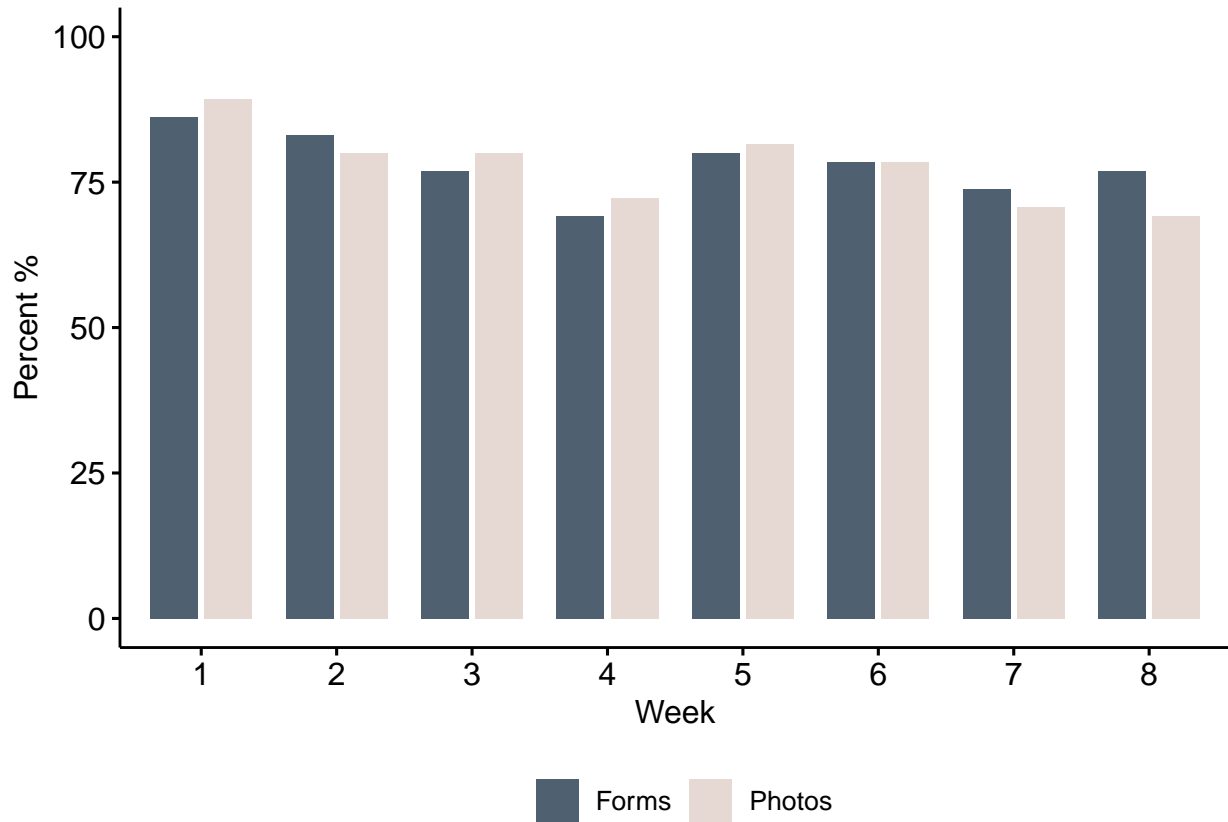

Bar plot 55 patients

| variable     | week_1 | week_2 | week_3 | week_4 | week_5 | week_6 | week_7 | week_8 |
|--------------|--------|--------|--------|--------|--------|--------|--------|--------|
| sum_form     | 52     | 53     | 50     | 45     | 52     | 51     | 48     | 50     |
| sum_pic      | 55     | 51     | 52     | 47     | 53     | 51     | 46     | 45     |
| n            | 55     | 55     | 55     | 55     | 55     | 55     | 55     | 55     |
| sum_all      | 107    | 104    | 102    | 92     | 105    | 102    | 94     | 95     |
| n_all        | 110    | 110    | 110    | 110    | 110    | 110    | 110    | 110    |
| perc_form    | 0.945  | 0.964  | 0.909  | 0.818  | 0.945  | 0.927  | 0.873  | 0.909  |
| perc_pic     | 1      | 0.927  | 0.945  | 0.855  | 0.964  | 0.927  | 0.836  | 0.818  |
| cumsum_form  | 52     | 105    | 155    | 200    | 252    | 303    | 351    | 401    |
| cumsum_pic   | 55     | 106    | 158    | 205    | 258    | 309    | 355    | 400    |
| cumsum_n     | 55     | 110    | 165    | 220    | 275    | 330    | 385    | 440    |
| cumsum_all   | 107    | 211    | 313    | 405    | 510    | 612    | 706    | 801    |
| cumsum_n_all | 110    | 220    | 330    | 440    | 550    | 660    | 770    | 880    |
| cumperc_form | 0.945  | 0.955  | 0.939  | 0.909  | 0.916  | 0.918  | 0.912  | 0.911  |
| cumperc_pic  | 1      | 0.964  | 0.958  | 0.932  | 0.938  | 0.936  | 0.922  | 0.909  |
| cumperc_all  | 0.973  | 0.959  | 0.948  | 0.92   | 0.927  | 0.927  | 0.917  | 0.91   |

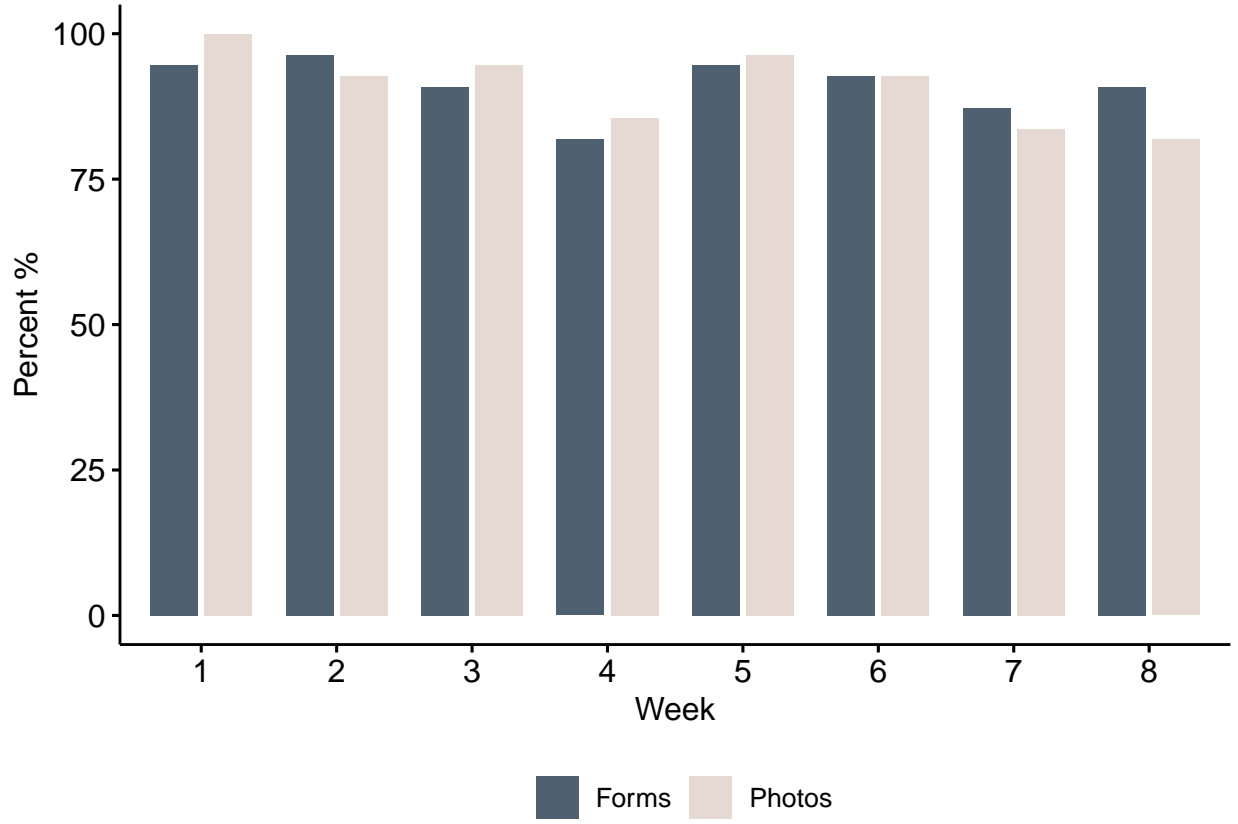

Line plots 65 patients

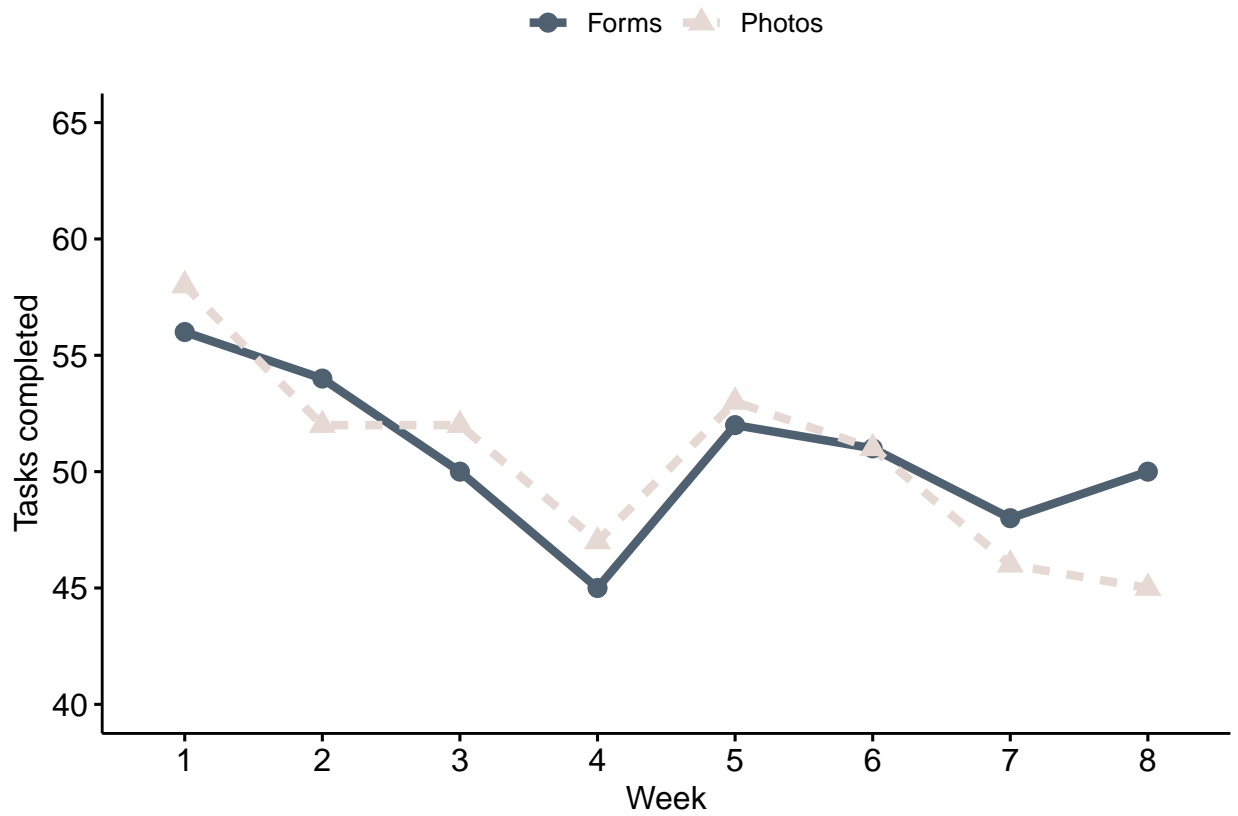

Line plots 55 patients

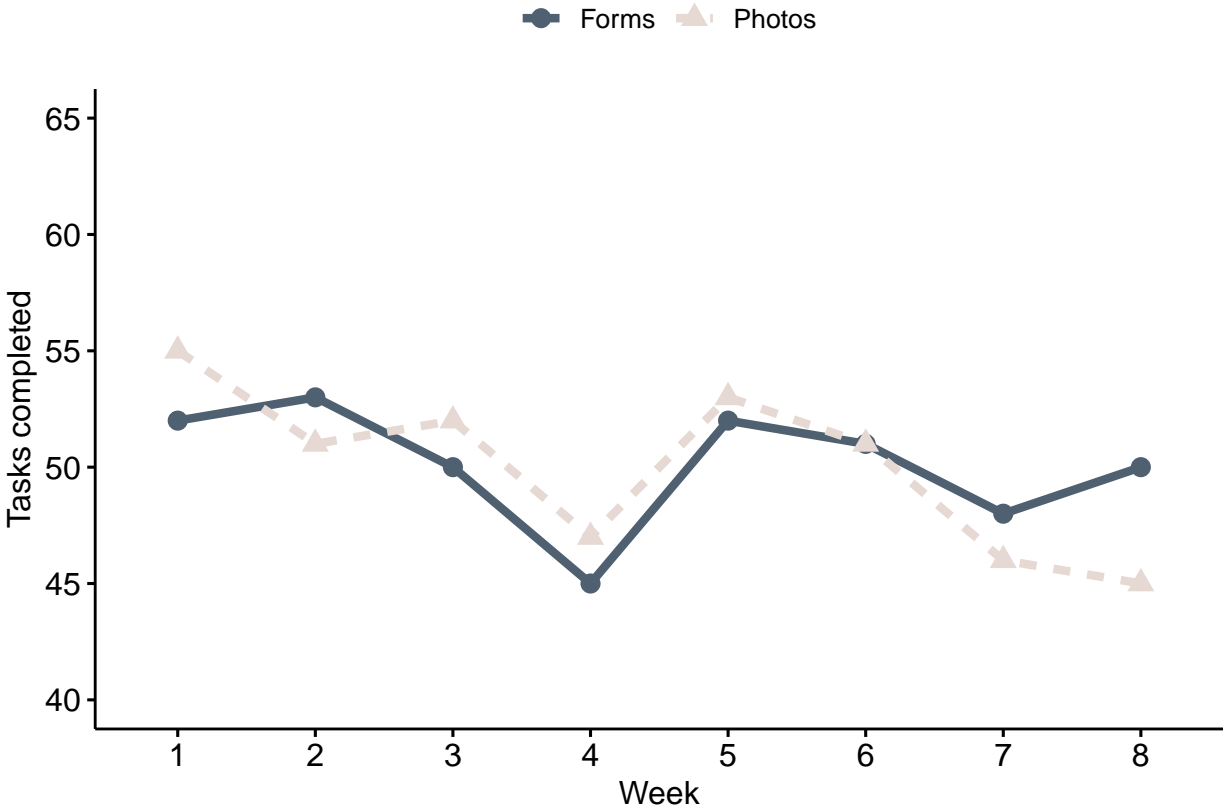

Supplement: pone.0235500.s001.pdf [file pone.0235500.s001.pdf]
