# Supplementary material for: High adherence and low dropout rate in a virtual clinical study of atopic dermatitis through weekly reward-based personalized genetic lifestyle reports
Source: PLoS One. 2020 Jul 2;15(7):e0235500. doi: 10.1371/journal.pone.0235500 (PMC7332076; doi:10.1371/journal.pone.0235500)
Supplement: S1 Raw data — (XLSX) [file pone.0235500.s004.xlsx]

## Sheet: Figure 1
	Women	Men	Unknown	Total
Completed the study	48	5	0	53
Enrolled in the study	50	5	0	55
Fulfilled inclusion criteria	57	8	0	65
Downloaded the app	79	12	0	91
Filled the participation form	135	29	0	164
Site visit	396	81	4	481

## Sheet: Figure 4
	Photos	Forms	Reports
Week 1	100	95	95
Week 2	93	96	91
Week 3	95	91	91
Week 4	85	82	80
Week 5	96	95	95
Week 6	93	93	93
Week 7	84	87	85
Week 8	82	91	84

## Sheet: Treatment
Treatment type	Moisturisers/barrier creams	Topical creams	Systemic medicines	Light treatment	Other
Total	48	44	6	8	8
%	0.8727	0.8	0.1091	0.1455	0.1455
Number of treatments used	Count	%
1	13	0.236364
2	29	0.527273
3	9	0.163636
4	4	0.0727273

## Sheet: Figure 3
Postcode	City	Municipality		Counts	Municipality
1360	København K	Copenhagen Municipality		15	Copenhagen Municipality
1366	København K	Copenhagen Municipality		1	Frederiksberg Municipality
1370	København K	Copenhagen Municipality		1	Municipality of Rødovre
1972	Frederiskberg	Frederiksberg Municipality		1	Municipality of Hoge-Taastrup
2100	København	Copenhagen Municipality		1	Hvidovre municipality
2100	København	Copenhagen Municipality		1	Lyngby-Taarbæk Municipality
2100	København	Copenhagen Municipality		1	Hillerød Municipality
2200	København N	Copenhagen Municipality		1	Furesø Municipality
2300	København	Copenhagen Municipality		1	Lejre Municipality
2300	København	Copenhagen Municipality		1	Holbæk Municipality
2300	København	Copenhagen Municipality		1	Køge Municipality
2300	København	Copenhagen Municipality		1	Naestved Municipality
2400	København NV	Copenhagen Municipality		2	Lolland Municipality
2400	København NV	Copenhagen Municipality		2	Odense Municipality
2450	København	Copenhagen Municipality		1	Sønderborg Municipality
2610	Rødøvre	Municipality of Rødovre		1	Herning Municipality
2630	Taastrup	Municipality of Hoge-Taastrup		1	Ikast-Brande Municipality
2650	Hvidovre	Hvidovre municipality		1	Holstebro Municipality
2800	Kongens Lyngby	Lyngby-Taarbæk Municipality		1	Lemvig Municipality
3400	Hillerød	Hillerød Municipality		1	Thisted Municipality
3520	Farum	Furesø Municipality		10	Municipality of Aarhus
4070	Kirke hyllinge	Lejre Municipality		1	Norddjurs Municipality
4440	Mørkøv	Holbæk Municipality		2	Silkeborg Municipality
4681	Herfølge	Køge Municipality		2	Aalborg municipality
4700	Næstved	Naestved Municipality		1	Brønderslev Municipality
4900	Nakskov	Lolland Municipality		1	Hjørring Municipality
4944	Fejø	Lolland Municipality		2	Frederikshavn Municipality
5200	Odense	Odense Municipality
5200	Odense	Odense Municipality
6300	Gråsten	Sønderborg Municipality
7400	Herning	Herning Municipality
7441	Bording	Ikast-Brande Municipality
7500	Holstebro	Holstebro Municipality
7660	København (Vanløse)	Copenhagen municipality
7660	Bækmarksbro	Lemvig Municipality
7700	Thisted	Thisted Municipality
8000	Aarhus	Municipality of Aarhus
8000	Aarhus	Municipality of Aarhus
8000	Aarhus	Municipality of Aarhus
8000	Aarhus	Municipality of Aarhus
8000	Aarhus	Municipality of Aarhus
8200	Aarhus	Municipality of Aarhus
8200	Aarhus	Municipality of Aarhus
8520	Lystrup	Municipality of Aarhus
8585	Glesborg	Norddjurs Municipality
8620	Kjellerup	Municipality of Aarhus
8700	Horsens	Silkeborg Municipality
8800	Aarhus	Municipality of Aarhus
8883	Gjern	Silkeborg Municipality
9000	Aalborg	Aalborg municipality
9220	Aalborg	Aalborg municipality
9330	Dronninglund	Brønderslev Municipality
9800	Hjørring	Hjørring Municipality
9900	Frederikshavn	Frederikshavn Municipality
9900	Ferederikshavn	Frederikshavn Municipality

## Sheet: Figure 5
Hvad motiverede dig til at udføre dit ugentlige check-in?	Categorisation 1. Contribute to research, 2. Gaining insights in own eczema, 3. Conscience, 4. DNA reports, 5. Curiousity, 6. Monitoring own eczema, 7. Seeing improvements in own eczema
No response	No response
Interessant studie og da jeg selv har kendskab til området vil man gerne være behjælpelig	Contribute to research
I høj grad påmindelserne!!! - og håbet om mere eksem-viden i den sidste rapport	Gaining insights in own eczema
No response	No response
No response	No response
Vores aftale	Conscience
No response	No response
Mit eksem	Gaining insights in own eczema
dna-rapporterne	DNA reports
DNA test svarene	DNA reports
No response	No response
Jeg var nysgerrig	Curiosity
No response	No response
DNA rapporterne	DNA reports
Rapporterne, at få mere viden som måske også har indflydelse på min hud	DNA reports
	Gaining insights in own eczema
At det låste op for en rapport om netop mit DNA	DNA reports
Syntes det var sjovt at tænke over udviklingen af min hud, samt at jeg godt kan lide at hjælpe projekter som disse	Monitoring own eczema
	Contribute to research
DNA-rapporterne	DNA reports
øsnket om at lære mere om mig selv og at kunne bidrage til forskning i eksem	Gaining insights in own eczema
	Contribute to research
Rapporterne	DNA reports
Rapporterne	DNA reports
Påmindelse. kan følge med i min eksem. Rapporter	Monitoring own eczema
	DNA reports
No response	No response
At jeg troede jeg ville blive klogere og se ændringer.	Gaining insights in own eczema
	Monitoring own eczema
No response	No response
min hud	Monitoring own eczema
At jeg har forpligtet mig til projektet	Conscience
DNA-rapporterne	DNA reports
Svarerne	DNA reports
No response	No response
mit samtykke	Conscience
DNA rapporterne	DNA reports
DNA rapport.	DNA reports
Primært Dna-rapporterne, men synes også det var sjovt at se på billeder af min huds udvikling.	DNA reports
	Monitoring own eczema
Jeg hjalp videnskaben	Contribute to research
No response	No response
Mail	NA
Dna rapport og interesse	DNA reports
Rapporten	DNA reports
At få resultaterne fra jeres rapport	DNA reports
Det var spændende at se forskellen	Monitoring own eczema

## Sheet: Figure 6
Hvad fik dig til at tilmelde dig undersøgelsen?	Categorization 1. Curiousity about eczema, 2. Interest in the research, 3. Wish to improve own eczema, 4. Curiousity about DNA, 5. Advertisement, 6. NA, 7. Feeling safe due to LEO Pharmas reputation 8. No response
Nysgerrihed omkring eksem	Curiousity about eczema
Interesse	Interest in the research
Mulighed for st finde svar.... jeg er en af de heldige der hsr været kastet lidt rundt mellem 4-5 læger der ikke synes det er specielt vigtigt at finde årsagen..	Wish to improve own eczema
Et voldsomt udbrud af eksem og ønsket om at der sættes mere fokus på forskningen omkring hudlidelser generelt.	Wish to improve own eczema
	Interest in the research
No response	No response
Nysgerrighed på atopisk dermatitis diagnose	Curiousity about eczema
Mulighed for at blive klogere på min eksem og hvordan jeg kan hjælpe min hud.	Wish to improve own eczema
Mit eksem	Wish to improve own eczema
nysgerrighed efter dna-test, og fordi jeg troede det ville give input til at afhjælpe min eksem, eks. intollerancer osv.	Curiousity about DNA
	Wish to improve own eczema
Nysgerrighed ang. eksem og DNA	Curiousity about eczema
	Curiousity about DNA
Mit håb er st kunne bidrage til større viden om børne eksem	Interest in the research
Jeg så det på Facebook og er meget plaget af eksem og allergi og det her var noget nyt, så måske kunne jeg få nogle svar jeg ikke havde hørt om før. Så jeg måske kunne gøre noget for at afhjælpe min egen situation.	Wish to improve own eczema
No response	No response
Min eksem var ekstrem, og DNA rapporterne virkede utroligt spændene.	Wish to improve own eczema
	Curiousity about DNA
En annonce på instagram, tror jeg. Træt af at have eksem, så tænke jeg at jeg måske kunne blive klogere på en løsning af at deltage	Advertisement
	Wish to improve own eczema
For at finde ud af mere omkring mit eksem	Wish to improve own eczema
Kan godt lide at hjælpe, og det virkede interessant	Interest in the research
Jeg ville gerne hjælpe + DNA-rap.	Interest in the research
	Curiousity about DNA
Ønsket om at kunne gøre noget selv, for at minimere min nyopståede eksem.	Wish to improve own eczema
Nysgerrig omkring mit dna	Curiousity about DNA
Nysgerrig omkring mit eksem	Curiousity about eczema
Forskning er altid godt	Interest in the research
Eksem	NA
At jeg er frustreret over min eksem, og ikke ved hvad jeg skal stille op for at det bliver bedre.	Wish to improve own eczema
min dårlig hud og håbet om at kunne skabe en forbedring eller mere forståelse	Wish to improve own eczema
Jeg ville nå til bunds ift min hudlidelse	Wish to improve own eczema
at jeg har atopisk eksem der bare er kommet ligepludselig da jeg var 15 og jeg har prøvet alt imod det. derfor tænkte jeg at DNA-rapporterne måske kunne give nogle flere svar	Wish to improve own eczema
Jeg ville gerne vide hvad jeg kunne gøre for ikke at få så meget eksem	Wish to improve own eczema
Nysgerrighed på min dna og hvordan min eksem kan forsvinde	Curiousity about DNA
	Wish to improve own eczema
nysgerrighed på eksem og mit dna	Curiousity about eczema
	Wish to improve own eczema
Jeg så en reklame et sted	Advertisement
Nysgerrighed om DNA og eksem.	Curiousity about DNA
	Curiousity about eczema
Synes det er svært at blive klog på min eksem, og i perioder er det som om jeg kan gøre hvad som helst uden at det har en længerevarende effekt. Og så har jeg to studiekammerater, der har lavet feltarbejde hos Leo Pharma. De sagde at i virkelig har styr på det i laver. Det gjorde mig tryg.	Wish to improve own eczema
	Feeling safe due to LEO Pharmas reputation
Sjovt at læse om sit DNA, imens man hjælper videnskaben	Curiousity about DNA
	Interest in the research
Jeg er desperat for at finde en løsning på min eksem	Wish to improve own eczema
Nysgerrighed	Curiousity about eczema
	Curiousity about DNA
Pårørende	Relatives
En annonce på Facebook og så interessen i at vide mere om sig selv og sit DNA	Advertisement
	Curiousity about eczema
	Curiousity about DNA
Reklame	Advertisement
Det lød spændende	Interest in the research
